# Supplementary material
Source: publisher site journal article supplement (http://e-cmh.org/upload/media/cmh-2023-0328-Supplementary-Table-4.pdf)
Supplement: Supplementary file 1 [file cmh-2023-0328-Supplementary-Table-4.pdf]

**Supplementary Table 4.** Baseline characteristics of patients who did not administer any lipid-lowering agents at baseline and during the study period

| Characteristics                      | Total (n=3,499)     | TAF (n=738)         | TDF (n=2,761)       | P-value |
|--------------------------------------|---------------------|---------------------|---------------------|---------|
| <b>Demographic characteristics</b>   |                     |                     |                     |         |
| Age (yr)                             | 49.9 (41.3–57.0)    | 49.1 (41.0–57.2)    | 50.0 (41.0–57.2)    | 0.904   |
| Male, n (%)                          | 2,125 (60.7)        | 401 (54.3)          | 1,724 (62.4)        | <0.001  |
| Height (cm)                          | 166.8 (160.0–172.8) | 167.1 (160.0–173.1) | 166.8 (160.0–172.8) | 0.522   |
| Weight (kg)                          | 65.7 (57.3–74.3)    | 66.1 (57.0–75.5)    | 65.5 (57.6–74.0)    | 0.456   |
| Body mass index (kg/m <sup>2</sup> ) | 23.9 (21.8–26.1)    | 23.9 (21.9–26.1)    | 23.9 (21.8–26.1)    | 0.584   |
| Systolic BP (mmHg)                   | 121.5 (110.0–134.0) | 126.0 (115.0–138.0) | 120.0 (108.0–133.0) | <0.001  |
| Diastolic BP (mmHg)                  | 73.0 (66.0–81.0)    | 76.0 (69.0–83.0)    | 72.0 (65.0–80.0)    | <0.001  |
| Smoking status, n (%)                |                     |                     |                     | 0.019   |
| Never smoker                         | 1,593 (45.5)        | 366 (49.6)          | 1,227 (44.4)        |         |
| Current smoker                       | 634 (18.1)          | 126 (17.1)          | 508 (18.4)          |         |
| Past smoker                          | 499 (14.3)          | 83 (11.2)           | 416 (15.1)          |         |
| Not available                        | 773 (22.1)          | 163 (22.1)          | 610 (22.1)          |         |
| <b>Comorbidities</b>                 |                     |                     |                     |         |
| Diabetes, n (%)                      | 220 (6.3)           | 47 (6.4)            | 173 (6.3)           | 0.987   |
| Hypertension, n (%)                  | 373 (10.7)          | 82 (11.1)           | 291 (10.5)          | 0.704   |
| Stroke, n (%)                        | 10 (0.3)            | 0 (0.0)             | 10 (0.3)            | 0.212   |
| Myocardial infarction, n (%)         | 3 (0.1)             | 0 (0.0)             | 3 (0.1)             | 0.851   |
| Heart failure, n (%)                 | 9 (0.3)             | 2 (0.3)             | 7 (0.3)             | 0.999   |
| Coronary artery disease, n (%)       | 18 (0.5)            | 4 (0.5)             | 14 (0.5)            | 0.999   |
| Cirrhosis, n (%)                     | 1,464 (41.8)        | 267 (36.2)          | 1,197 (43.4)        | 0.001   |
| Fatty liver, n (%)                   | 497 (14.2)          | 156 (21.1)          | 341 (12.4)          | <0.001  |
| HCC, n (%)                           | 243 (6.9)           | 11 (1.5)            | 232 (8.4)           | <0.001  |
| <b>Laboratory findings</b>           |                     |                     |                     |         |
| Platelets (×10 <sup>3</sup> /μL)     | 165.0 (118.0–209.0) | 175.0 (140.0–216.0) | 162.0 (111.0–207.0) | <0.001  |
| AST (IU/L)                           | 55.0 (35.0–92.0)    | 52.0 (34.0–90.0)    | 56.0 (35.0–92.0)    | 0.276   |
| ALT (IU/L)                           | 56.0 (30.0–120.0)   | 64.0 (32.0–122.0)   | 55.0 (30.0–120.0)   | 0.237   |
| Prothrombin time, INR                | 1.1 (1.0–1.2)       | 1.0 (1.0–1.1)       | 1.1 (1.0–1.2)       | <0.001  |
| Albumin (g/dL)                       | 3.9 (3.5–4.1)       | 3.9 (3.7–4.1)       | 3.9 (3.5–4.2)       | 0.391   |
| Total bilirubin (mg/dL)              | 0.8 (0.6–1.1)       | 0.7 (0.6–0.9)       | 0.8 (0.6–1.2)       | <0.001  |
| Creatinine (mg/dL)                   | 0.8 (0.7–0.9)       | 0.8 (0.7–0.9)       | 0.8 (0.7–0.9)       | 0.555   |
| eGFR (mL/min/1.73m <sup>2</sup> )    | 102.0 (93.0–110.0)  | 101.0 (93.0–109.0)  | 102.0 (94.0–111.0)  | 0.016   |
| Total cholesterol (mg/dL)            | 169.0 (146.0–193.0) | 182.0 (162.0–204.0) | 165.0 (142.0–190.0) | <0.001  |
| HDL (mg/dL)                          | 51.0 (42.0–61.0)    | 56.0 (46.0–65.0)    | 50.0 (40.0–59.0)    | <0.001  |
| LDL (mg/dL)                          | 109.0 (87.0–131.0)  | 116.0 (100.0–134.0) | 104.0 (80.0–130.0)  | <0.001  |
| Triglyceride (mg/dL)                 | 84.0 (67.0–113.0)   | 87.0 (70.0–115.0)   | 83.0 (66.0–111.0)   | 0.029   |
| HBeAg-positive, n (%)                | 1,491 (47.6)        | 312 (44.1)          | 1,179 (48.6)        | 0.036   |
| HBV DNA (log <sub>10</sub> IU/mL)    | 5.5 (3.2–7.0)       | 5.5 (3.8–7.1)       | 5.5 (3.0–7.0)       | 0.003   |

Data are presented as a frequency and proportion or as a mean value with interquartile range.

TAF, tenofovir alafenamide; TDF, tenofovir disoproxil fumarate; BP, blood pressure; ALT, alanine aminotransferase; AST, aspartate aminotransferase; INR, international normalized ratio; eGFR, estimated glomerular filtration rate; HDL, high-density lipoprotein; LDL, low-density lipoprotein; HBeAg, hepatitis B e antigen; HBV, hepatitis B virus.
